# Supplementary material for: Sexual conflict over remating interval is modulated by the sex peptide pathway
Source: PubMed Central journal article supplement (PMC5360916; doi:10.1098/rspb.2016.2394), 2017-03-01
Supplement: rspb20162394supp1.pdf [file rspb20162394supp1.pdf]

1 **Sexual conflict over remating interval is modulated by**  
2 **the sex peptide pathway**

3 Damian T. Smith<sup>1</sup>, Naomi V. E. Clarke<sup>1</sup>, James M. Boone<sup>1</sup>, Claudia Fricke<sup>2</sup>, Tracey  
4 Chapman<sup>1\*</sup>

5 <sup>1</sup> School of Biological Sciences, University of East Anglia, Norwich Research Park,  
6 Norwich, NR4 7TJ, UK

7 <sup>2</sup> Institute for Evolution and Biodiversity, University of Muenster, Huefferstr. 1, 48149  
8 Muenster, Germany

9 Phone: + 44 (0)1603 593210

10 FAX: + 44 (0)1603 592250

11 \*Author for correspondence: Tracey Chapman

12 e-mail: [tracey.chapman@uea.ac.uk](mailto:tracey.chapman@uea.ac.uk)

13

14 **Electronic Supplementary Information**

15 Figures S1-S6.

16 Tables S1-S8.

17

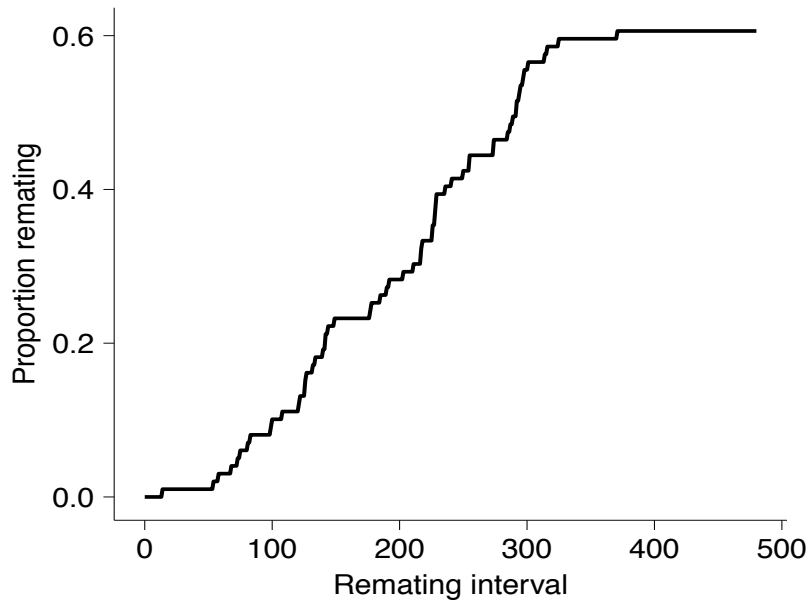

18

19 **Figure S1.** Cumulative remating frequency of wild type females under continuous male  
20 exposure. Shown is the cumulative proportion of wild type females remating, against  
21 time in minutes, when continuously exposed to wild type males following first matings  
22 with wild type males. The data show that ~60% of females remated within 6 hours (360  
23 minutes).

24

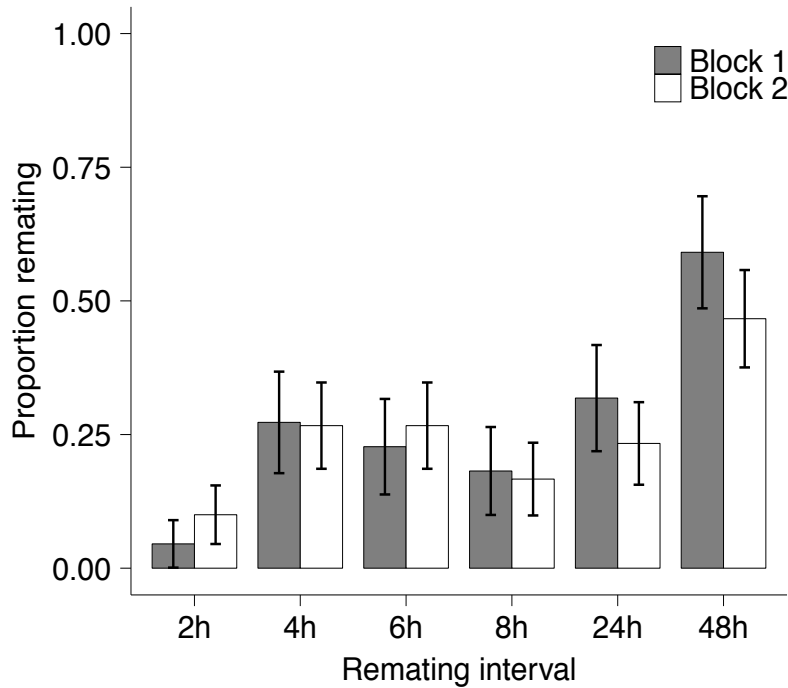

26

27 **Figure S2.** Proportion of wild type females remating at different remating intervals in  
 28 remating tests. Shown are two experimental blocks (block 1,2) of the proportion of wild  
 29 type females that remated with wild type males at the remating intervals shown, after  
 30 first mating with wild type males. ~30% of females remated as early as 4h after their  
 31 first mating.

32

33

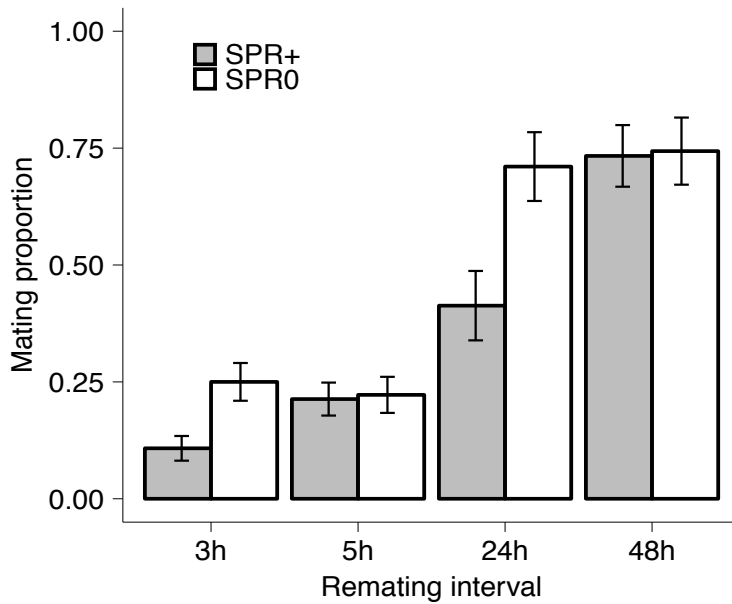

34

35 **Figure S3.** Proportion of individuals that remated at different remating intervals in the  
36 main fitness experiment. The proportion of control ( $SPR^+$ , grey bars) or  $SPR^0$  (white bars)  
37 females in the main fitness experiment that remated with dsRed-sperm males at the  
38 remating intervals shown, following first matings with GFP-sperm males. Consistent with  
39 the data from the wild type and  $SPR^{+/0}$  experiments (figures S1, S2, S4, S5) a high  
40 proportion of females remated at the early time points tested, even in the control  
41 females.

42

43

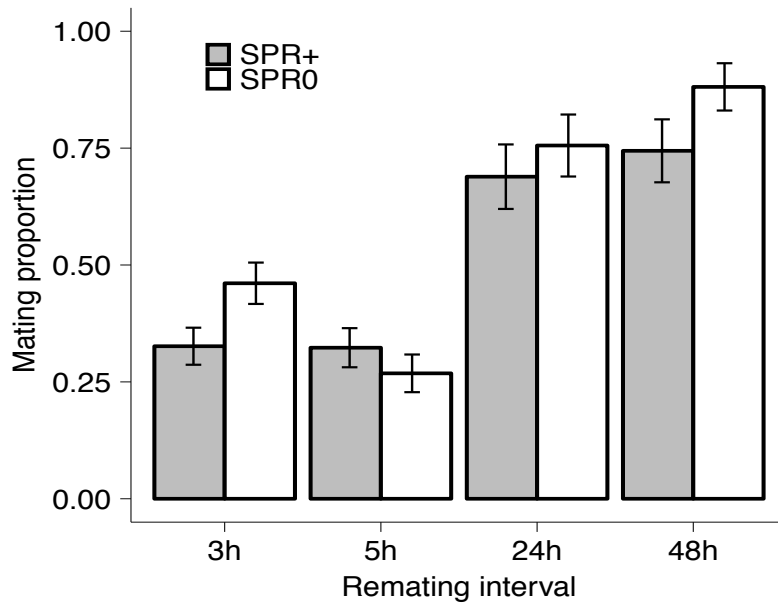

44

45 **Figure S4.** Proportion of individuals that remated at different remating intervals for the  
46 sperm count experiment. The proportion of control ( $SPR^+$ , grey bars) or  $SPR^0$  (white  
47 bars) females in the sperm count experiment that remated with dsRed-sperm males at  
48 the remating intervals shown, following first matings with GFP-sperm males. Consistent  
49 with the data from the wild type and  $SPR^{+/0}$  experiments (Figures S1, S2, S3, S5) a high  
50 proportion of females remated at the early time points tested, even in the control  
51 females.

52

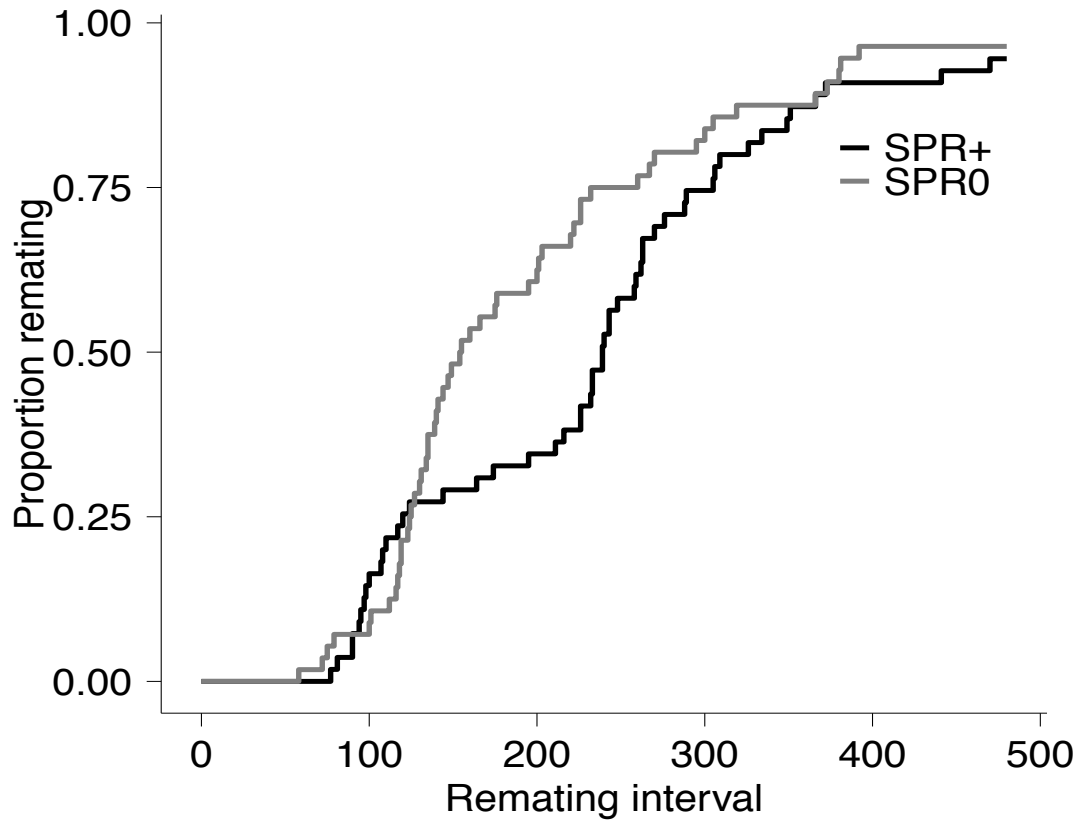

53

54 **Figure S5.** Cumulative remating frequency of unmanipulated ("natural") rematings by

55 once-mated  $SPR^+$  and  $SPR^0$  females continuously exposed to wild type males.

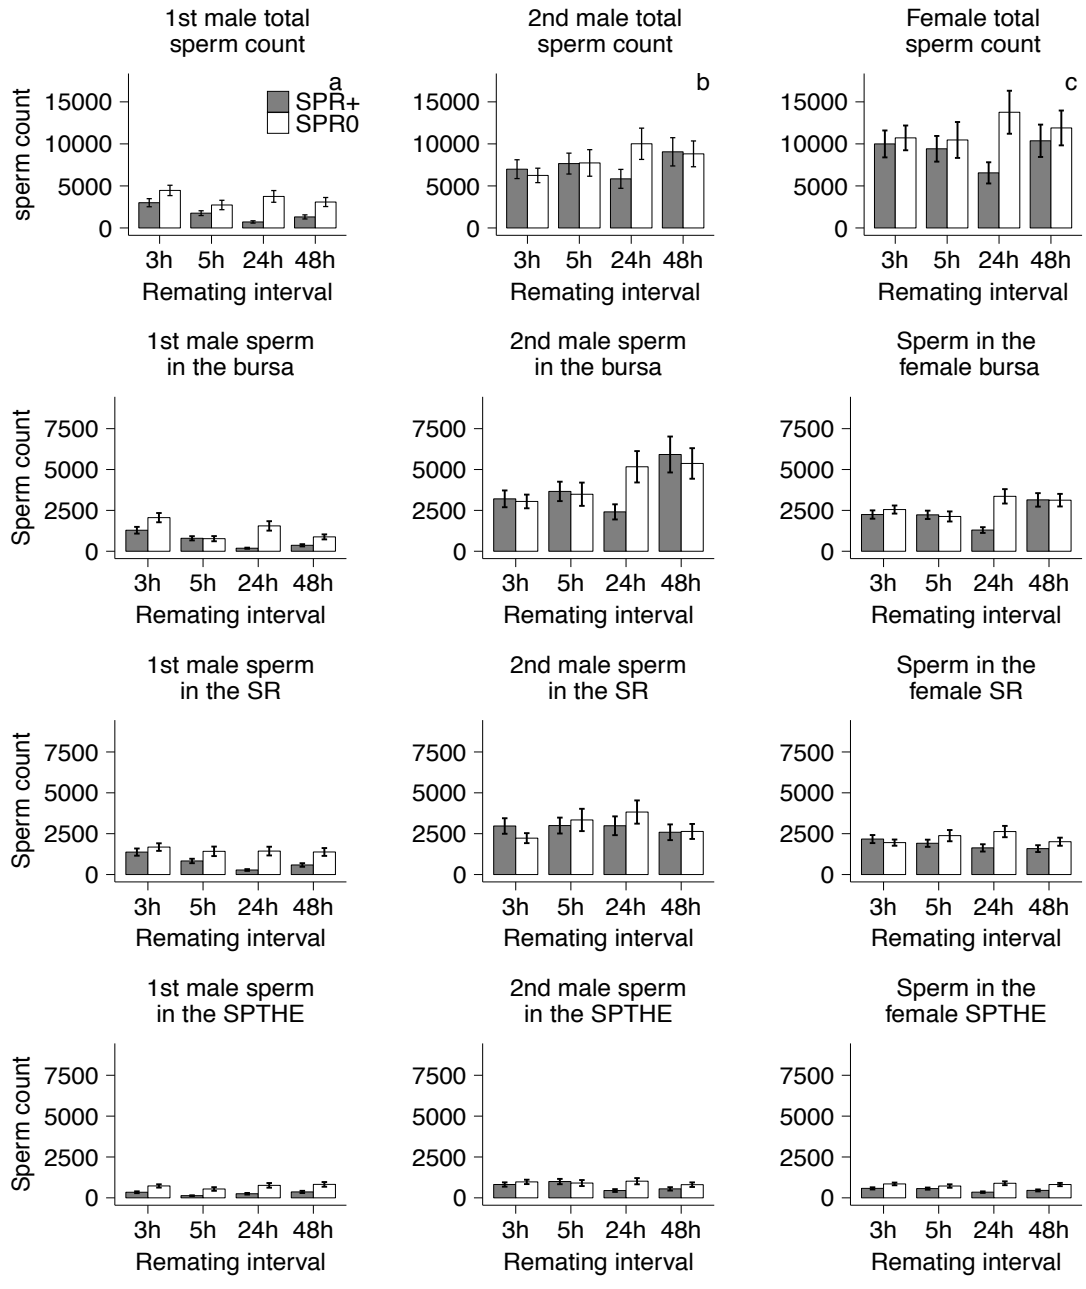

56

57 **Figure S6. Number of sperm from the first and second male in storage in the female.**

58 The number of sperm is in arbitrary units of fluorescence derived from the number of  
 59 fluorescent pixels in each of the captured images (mean  $\pm$  se). Shown in the LH column in  
 60 each case is the sperm count for the first male (green fluorescence), in the middle  
 61 column the count for the second male (red fluorescence) and in the RH column the total  
 62 sperm count (total fluorescence). The top row shows the sperm counts for all the sperm

63 storage organs plus the bursa, the second row the sperm counts for the bursa only, the  
64 third for the seminal receptacle (SR) only and the bottom row for the two spermathecae  
65 combined (SPTHE). The results show that there was little correlation between the  
66 pattern of sperm storage and offspring paternity / numbers shown in figure 1 in the  
67 main text.



68 **Table S1.** The number of flies that were initially setup, that mated, that did not mate  
 69 (unmated), that were lost during the setup and the mating success, for each remating  
 70 timepoint ('time') and female *SPR* status in the main fitness experiment.

71

| time | <i>SPR</i> <sup>+ / 0</sup> | setup | mated | unmated | lost | mating<br>success | se   |
|------|-----------------------------|-------|-------|---------|------|-------------------|------|
| 0h   | <i>SPR</i> <sup>+</sup>     | 400   | 336   | 22      | 12   | 0.84              | 0.02 |
| 0h   | <i>SPR</i> <sup>0</sup>     | 400   | 310   | 88      | 2    | 0.78              | 0.02 |
| 3h   | <i>SPR</i> <sup>+</sup>     | 139   | 15    | 123     | 1    | 0.11              | 0.03 |
| 3h   | <i>SPR</i> <sup>0</sup>     | 116   | 29    | 86      | 1    | 0.25              | 0.04 |
| 5h   | <i>SPR</i> <sup>+</sup>     | 136   | 29    | 106     | 1    | 0.21              | 0.04 |
| 5h   | <i>SPR</i> <sup>0</sup>     | 117   | 26    | 90      | 1    | 0.22              | 0.04 |
| 24h  | <i>SPR</i> <sup>+</sup>     | 46    | 19    | 25      | 2    | 0.41              | 0.07 |
| 24h  | <i>SPR</i> <sup>0</sup>     | 38    | 27    | 11      | 0    | 0.71              | 0.07 |
| 48h  | <i>SPR</i> <sup>+</sup>     | 45    | 33    | 12      | 0    | 0.73              | 0.07 |
| 48h  | <i>SPR</i> <sup>0</sup>     | 39    | 29    | 8       | 2    | 0.74              | 0.07 |

72

73

74 **Table S2.** The number of flies that were initially setup, that mated, that did not mate  
 75 (unmated), that were lost during the setup and the mating success, for each remating  
 76 timepoint ('time') and female *SPR* status in the main sperm storage experiment.

77

| time | <i>SPR</i> <sup>+/-0</sup> | setup | mated | unmated | lost | mating<br>success | se   |
|------|----------------------------|-------|-------|---------|------|-------------------|------|
| 0h   | <i>SPR</i> <sup>+</sup>    | 400   | 357   | 22      | 21   | 0.89              | 0.02 |
| 0h   | <i>SPR</i> <sup>0</sup>    | 400   | 338   | 37      | 25   | 0.84              | 0.02 |
| 3h   | <i>SPR</i> <sup>+</sup>    | 141   | 46    | 94      | 1    | 0.33              | 0.04 |
| 3h   | <i>SPR</i> <sup>0</sup>    | 128   | 59    | 68      | 1    | 0.46              | 0.04 |
| 5h   | <i>SPR</i> <sup>+</sup>    | 130   | 42    | 83      | 5    | 0.32              | 0.04 |
| 5h   | <i>SPR</i> <sup>0</sup>    | 123   | 33    | 88      | 2    | 0.27              | 0.04 |
| 24h  | <i>SPR</i> <sup>+</sup>    | 45    | 31    | 14      | 0    | 0.69              | 0.07 |
| 24h  | <i>SPR</i> <sup>0</sup>    | 45    | 34    | 8       | 3    | 0.76              | 0.07 |
| 48h  | <i>SPR</i> <sup>+</sup>    | 43    | 32    | 10      | 1    | 0.74              | 0.07 |
| 48h  | <i>SPR</i> <sup>0</sup>    | 42    | 37    | 4       | 1    | 0.88              | 0.05 |

78

79

80 **Table S3.** ANOVA table for first male offspring production with remating interval ('time')  
 81 and female *SPR* status ('SPR') and their interactions as explanatory factors.

|          |    |          | Resid. | Resid.   |       |        |
|----------|----|----------|--------|----------|-------|--------|
|          | Df | Deviance | Df     | Dev      | F     | Pr(>F) |
| NULL     | NA | NA       | 121    | 1484.360 | NA    | NA     |
| time     | 3  | 272.767  | 118    | 1211.593 | 8.885 | 0.000  |
| SPR      | 1  | 6.100    | 117    | 1205.493 | 0.596 | 0.442  |
| time:SPR | 3  | 118.700  | 114    | 1086.794 | 3.867 | 0.011  |

82

83 **Table S4.** ANOVA table for second male offspring production with remating interval  
 84 ('time') and female *SPR* status ('SPR') and their interactions as explanatory factors.

|          |    |          | Resid. | Resid.   |        |        |
|----------|----|----------|--------|----------|--------|--------|
|          | Df | Deviance | Df     | Dev      | F      | Pr(>F) |
| NULL     | NA | NA       | 208    | 2807.138 | NA     | NA     |
| time     | 3  | 464.178  | 205    | 2342.960 | 17.746 | 0.000  |
| SPR      | 1  | 368.103  | 204    | 1974.857 | 42.219 | 0.000  |
| time:SPR | 3  | 114.450  | 201    | 1860.407 | 4.376  | 0.005  |

85

86 **Table S5.** ANOVA table for female offspring production with remating interval ('time')  
 87 and female *SPR* status ('SPR') and their interactions as explanatory factors.

|          |    |           | Resid. | Resid.   |        |        |
|----------|----|-----------|--------|----------|--------|--------|
|          | Df | Deviance  | Df     | Dev      | F      | Pr(>F) |
| NULL     | NA | NA        | 208    | 99190.47 | NA     | NA     |
| time     | 3  | 6704.451  | 205    | 92486.02 | 6.258  | 0.000  |
| SPR      | 1  | 14634.439 | 204    | 77851.58 | 40.983 | 0.000  |
| time:SPR | 3  | 6076.582  | 201    | 71775.00 | 5.672  | 0.001  |

88

89 **Table S6.** ANOVA table showing the analysis of first male sperm numbers (arbitrary units  
90 of fluorescence) stored in the female reproductive tract with sperm storage organ  
91 ('tissue'), remating interval ('time') and female *SPR* status ('SPR') and their interactions  
92 as explanatory factors.

|                 | Df | Deviance  | Resid.<br>Df | Resid.<br>Dev | F      | Pr(>F) |
|-----------------|----|-----------|--------------|---------------|--------|--------|
| NULL            | NA | NA        | 815          | 1830577       | NA     | NA     |
| time            | 3  | 55356.625 | 812          | 1775220       | 6.466  | 0.000  |
| SPR             | 1  | 76245.565 | 811          | 1698975       | 26.717 | 0.000  |
| tissue          | 2  | 88035.587 | 809          | 1610939       | 15.424 | 0.000  |
| time:SPR        | 3  | 28283.131 | 806          | 1582656       | 3.304  | 0.020  |
| time:tissue     | 6  | 20957.835 | 800          | 1561698       | 1.224  | 0.292  |
| SPR:tissue      | 2  | 1391.093  | 798          | 1560307       | 0.244  | 0.784  |
| time:SPR:tissue | 6  | 10357.879 | 792          | 1549949       | 0.605  | 0.727  |

93

94 **Table S7.** ANOVA table for second male sperm numbers (arbitrary units of fluorescence)  
 95 stored in the female reproductive tract with sperm storage organ ('tissue'), remating  
 96 interval ('time') and female SPR status ('SPR') and their interactions as explanatory  
 97 factors.

98

|                 | Df | Deviance   | Resid. Df | Resid. Dev | F       | Pr(>F) |
|-----------------|----|------------|-----------|------------|---------|--------|
| NULL            | NA | NA         | 815       | 2998814    | NA      | NA     |
| time            | 3  | 28323.921  | 812       | 2970490    | 3.492   | 0.015  |
| SPR             | 1  | 2992.911   | 811       | 2967497    | 1.107   | 0.293  |
| tissue          | 2  | 613738.427 | 809       | 2353759    | 113.501 | 0.000  |
| time:SPR        | 3  | 29962.817  | 806       | 2323796    | 3.694   | 0.012  |
| time:tissue     | 6  | 46521.726  | 800       | 2277274    | 2.868   | 0.009  |
| SPR:tissue      | 2  | 3964.935   | 798       | 2273309    | 0.733   | 0.481  |
| time:SPR:tissue | 6  | 9772.519   | 792       | 2263537    | 0.602   | 0.729  |

99

100

101 **Table S8.** ANOVA table for total sperm numbers (arbitrary units of fluorescence) stored  
 102 in the female reproductive tract with sperm storage organ ('tissue'), remating interval  
 103 ('time') and female SPR status and their interactions as explanatory factors.

|                 | Df | Deviance   | Resid. Df | Resid. Dev | F       | Pr(>F) |
|-----------------|----|------------|-----------|------------|---------|--------|
| NULL            | NA | NA         | 815       | 3280204    | NA      | NA     |
| time            | 3  | 5640.558   | 812       | 3274563    | 0.598   | 0.616  |
| SPR             | 1  | 35197.246  | 811       | 3239366    | 11.194  | 0.001  |
| tissue          | 2  | 660016.339 | 809       | 2579350    | 104.950 | 0.000  |
| time:SPR        | 3  | 43634.068  | 806       | 2535715    | 4.626   | 0.003  |
| time:tissue     | 6  | 24901.855  | 800       | 2510814    | 1.320   | 0.246  |
| SPR:tissue      | 2  | 7993.723   | 798       | 2502820    | 1.271   | 0.281  |
| time:SPR:tissue | 6  | 13777.527  | 792       | 2489042    | 0.730   | 0.625  |

104

105
